# Supplementary material for: Age- and Sex-Specific Deterioration on Bone and Osteocyte Lacuno-Canalicular Network in a Mouse Model of Premature Aging
Source: Research Square preprint supplement (doi:10.21203/rs.3.rs-4646934/v1), 2024-08-13
Supplement: Supplementary file 2 [file be0cd14221ad5f262c5f7270.docx]

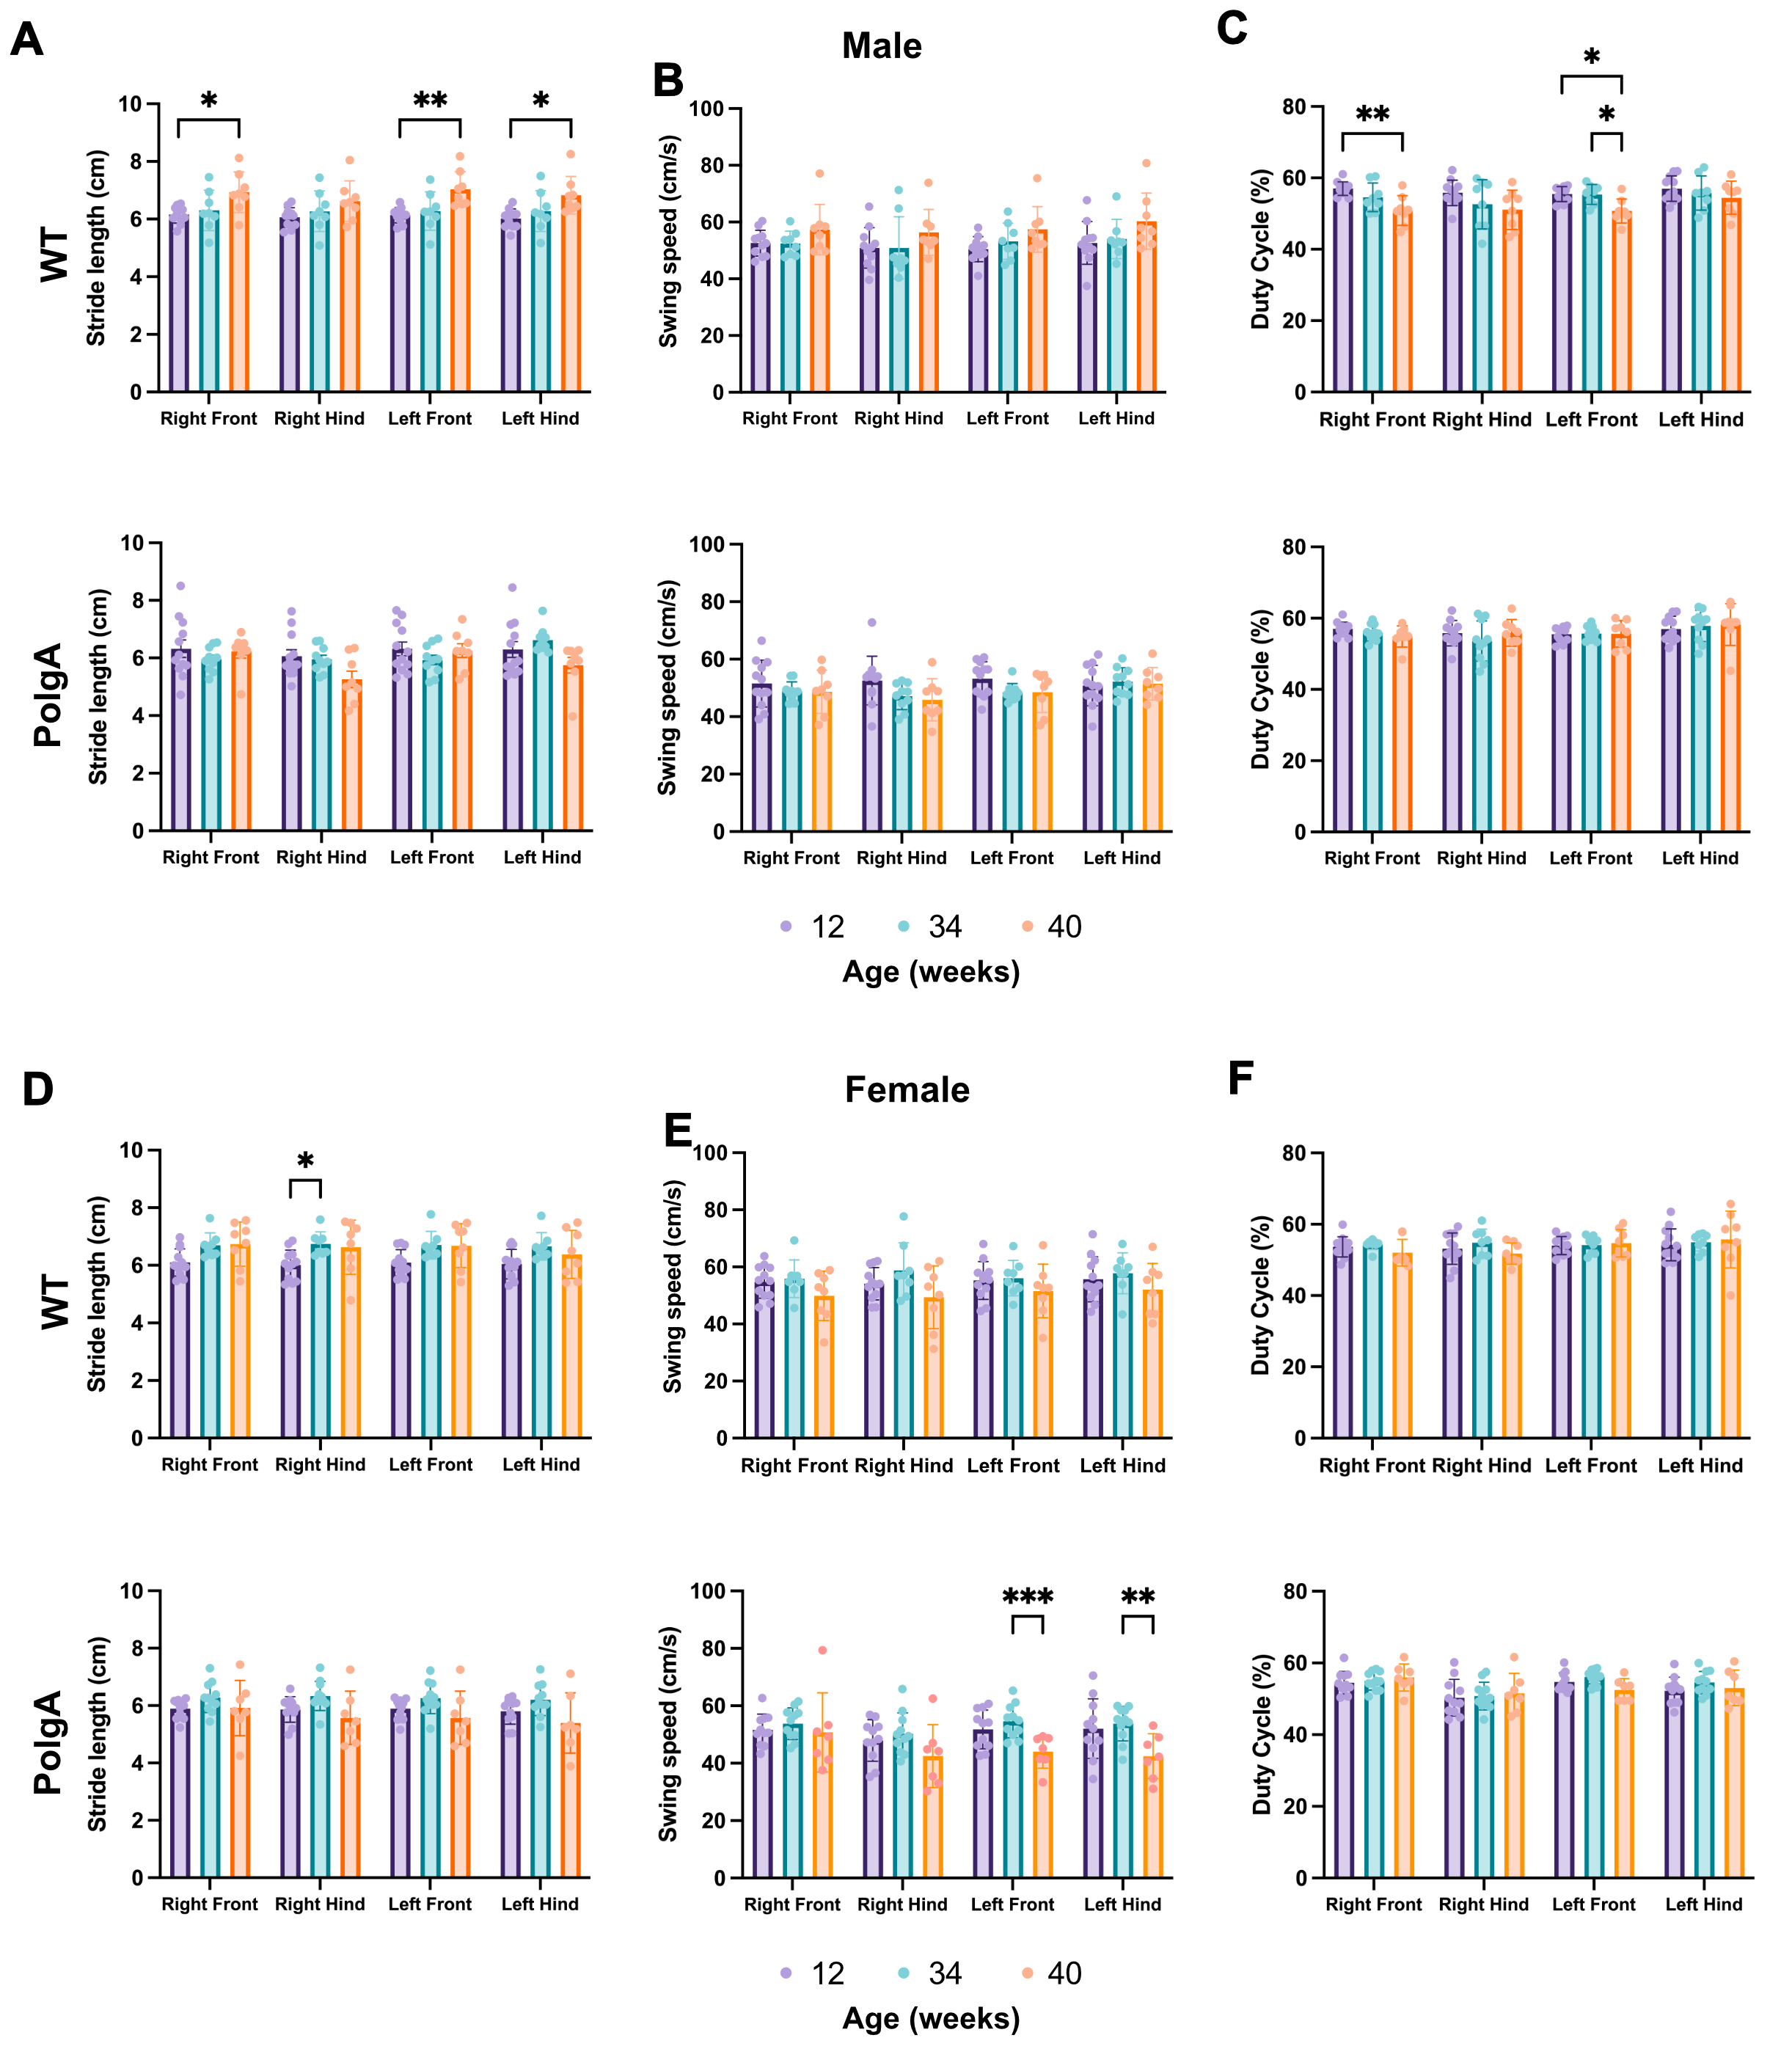


**Supplementary Figure 2: Analysis of the age- and sex-related changes in the gait parameters in PolgA mice** A) Stride length (cm) B) Swing speed (cm/s) C) Duty cycle (%) for each limb of male and female PolgA mice and their WT littermates across the different ages Data represents mean ± sd, (n=7-13 mice/group). Statistical significance was determined by two-way ANOVA with Tukey post hoc test (p*<0.05, **p<0.01, ***p<0.001).


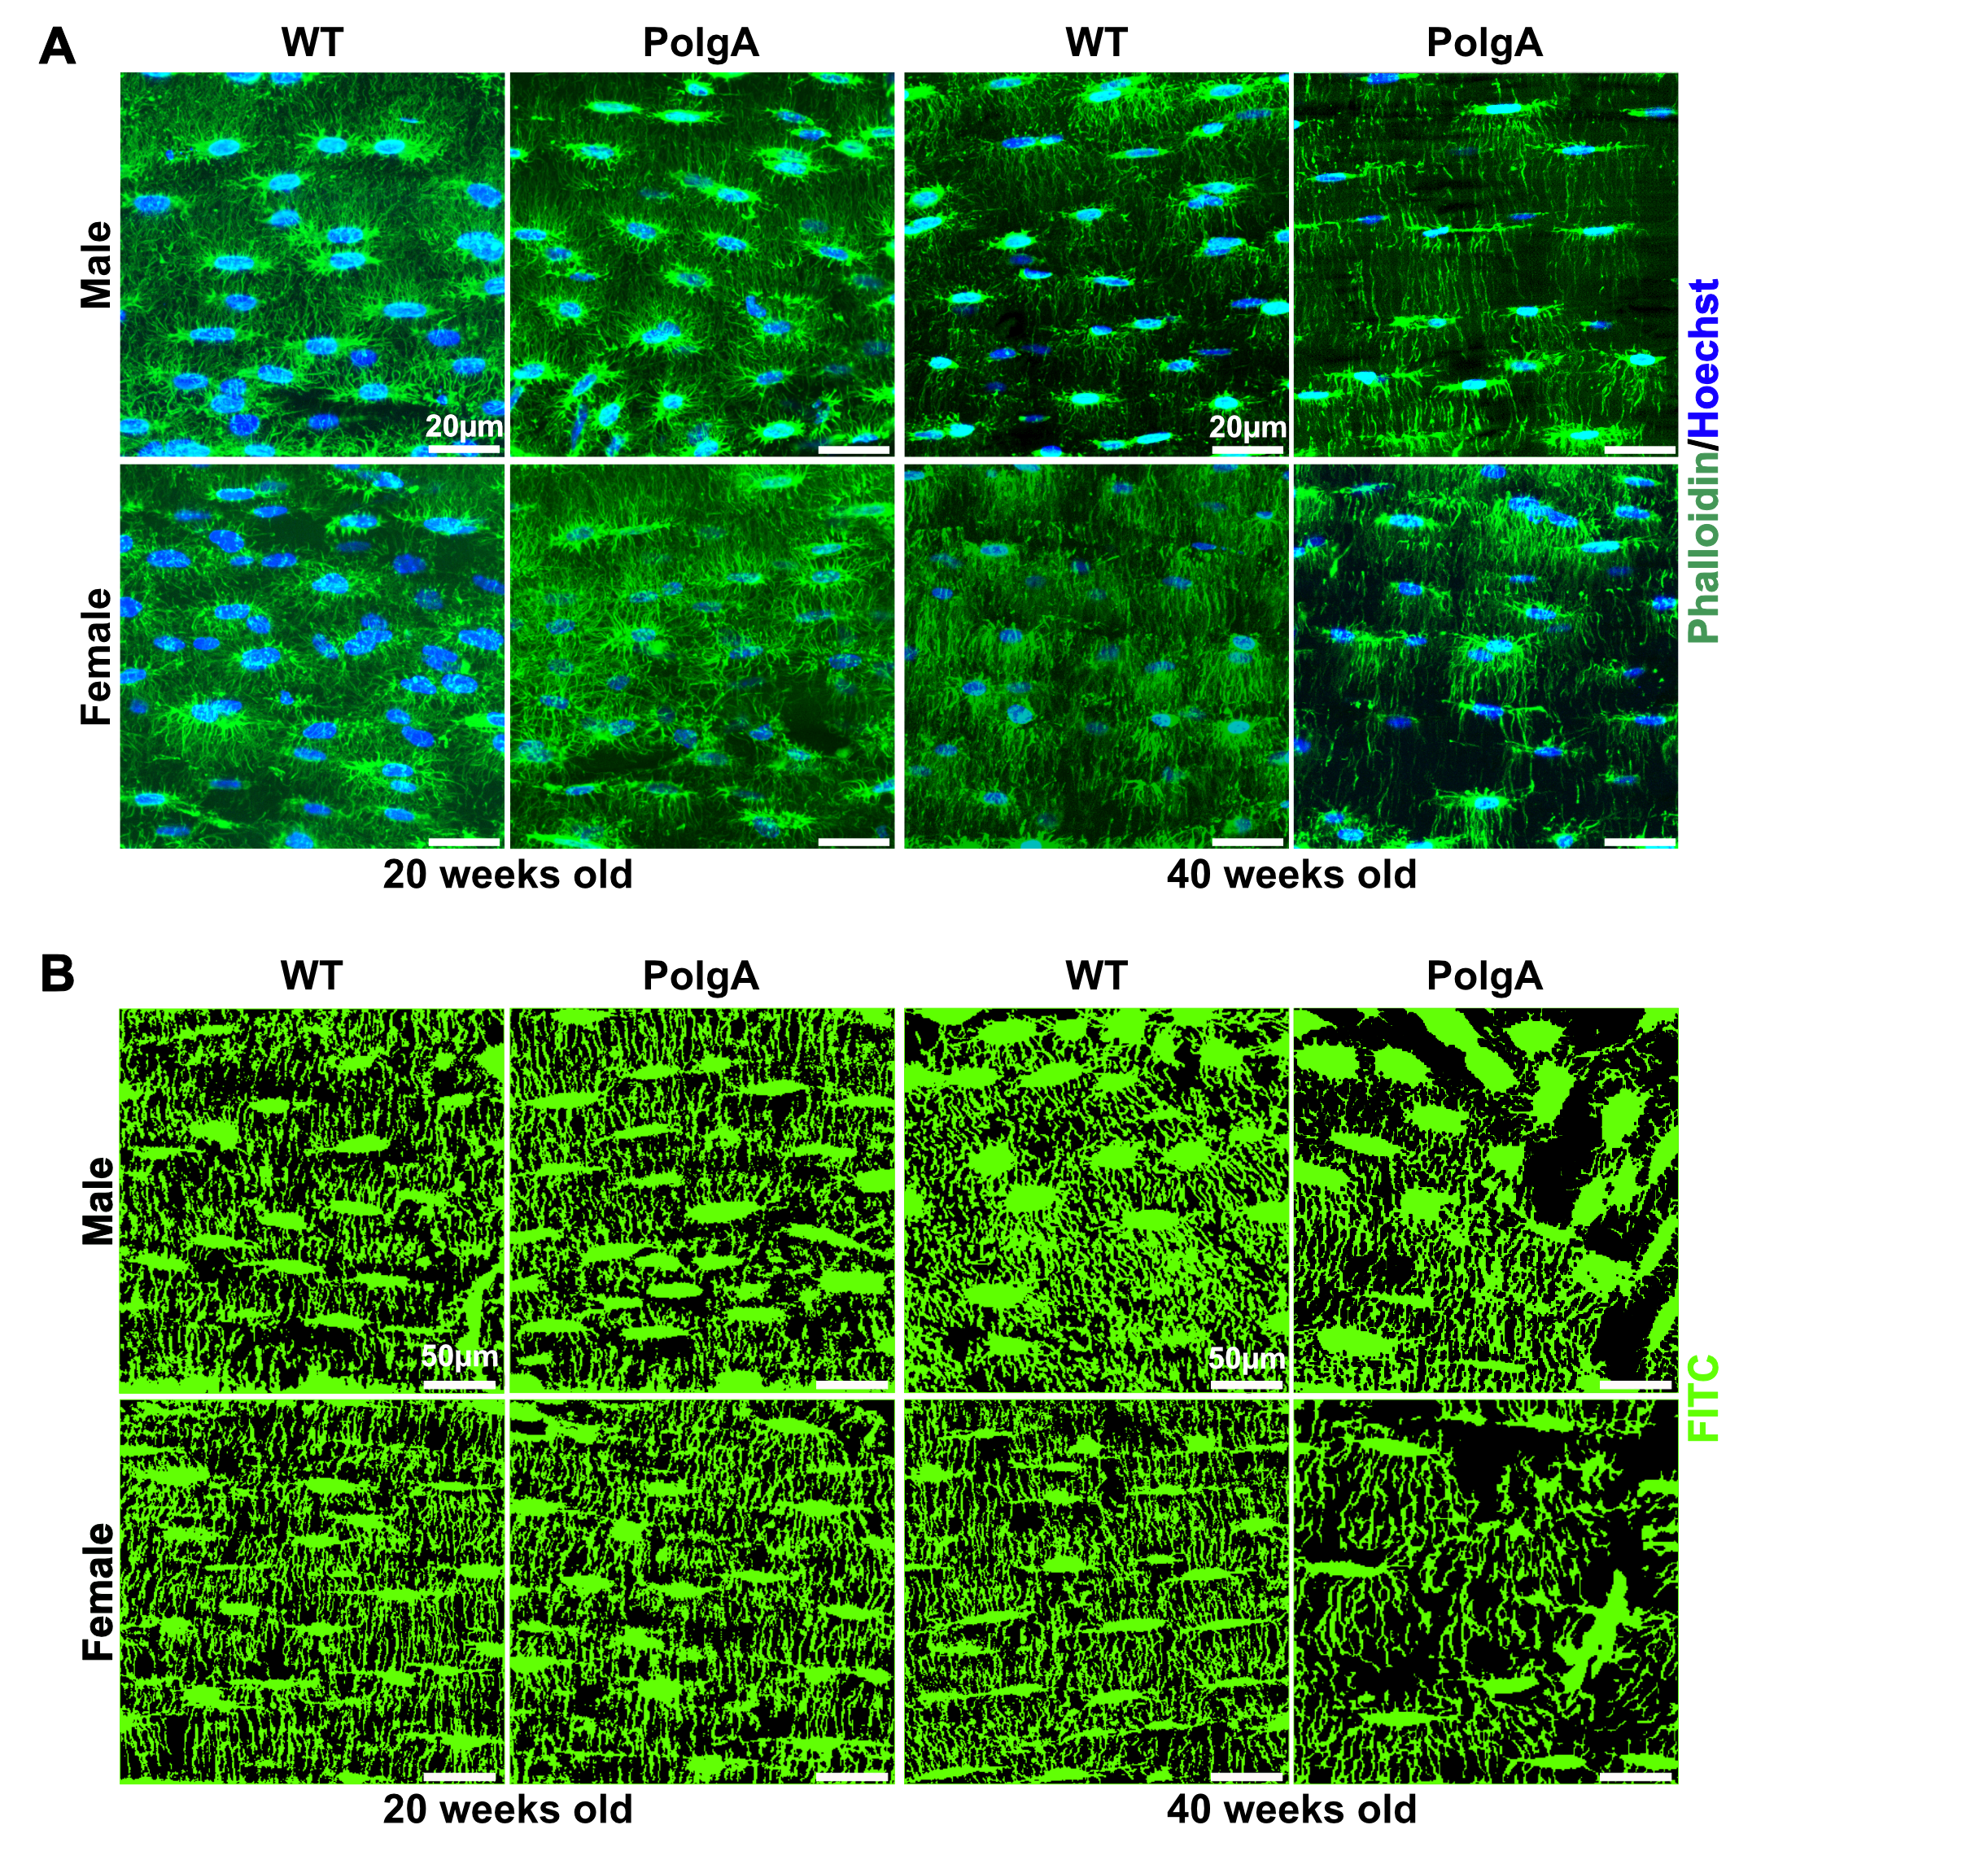


**Supplementary Figure 2: Degeneration of osteocyte network and LCN connectivity with aging in PolgA mice:** A) Representative high magnification images of Phalloidin (F-actin, green) and Hoechst (nucleus, blue) stained sections illustrating degeneration of osteocyte networks and B) representative maximum intensity projection images of FITC stained sections showing LCN disruption in male and female PolgA mice and their WT littermates at 20 and 40 weeks.

**Supplementary Table 1: Bone structural parameters in the full, trabecular, and cortical regions of the femurs of PolgA mice and WT littermates at 20 and 40 weeks assessed by *ex vivo* micro-CT**
Parameter legend: average volume density (AVD), bone volume fraction (BV/TV), trabecular thickness (Tb.Th), trabecular number (Tb.N), trabecular separation (Tb.Sp), cortical area fraction (Ct.Ar/Tt.Ar), total cross-sectional area inside the periosteal envelope (Tt.Ar), cortical bone area (Ct.Ar), cortical thickness (Ct.Th). Data represent mean±s.d. (n=8-16 mice/group).

|  | **20 weeks** | | | |
| --- | --- | --- | --- | --- |
|  | **Males** | | **Females** | |
|  | PolgA | WT | PolgA | WT |
| **Parameters** |
| AVD [%] | 46.05±3.48 | 47.26±2.19 | 46.83±2.05 | 46.74±0.82 |
| BV/TV [%] | 9.05±3.33 | 7.92±1.55 | 2.58±0.94 | 2.62±2.94 |
| Tb.Sp [mm] | 0.34±0.09 | 0.29±0.04 | 0.39±0.10 | 0.39±0.10 |
| Tb.N [1/mm] | 3.16±0.36 | 2.83±0.50 | 2.40±0.47 | 2.39±0.45 |
| Tb.Th [mm] | 0.04±0.00 | 0.06±0.00 | 0.05±0.00 | 0.05±0.00 |
| Ct.Ar/Tt.Ar [%] | 42.38±2.41 | 42.74±1.39 | 47.56±2.01 | 47.25±1.55 |
| Tt. Ar [%] | 2.01±0.20 | 1.95±0.14 | 1.58±0.07 | 1.61±0.12 |
| Ct. Ar [mm²] | 0.85±0.12 | 0.83±0.06 | 0.75±0.03 | 0.77±0.02 |
| Ct. Th [mm] | 0.18±0.00 | 0.18±0.00 | 0.19±0.00 | 0.19±0.00 |

|  | **40 weeks** | | | | | |
| --- | --- | --- | --- | --- | --- | --- |
|  | **Males** | | **Females** | | | |
|  | PolgA | WT | | PolgA | | WT | |
| **Parameters** |  |  |  | |  | |
| AVD [%] | 37.27±3.35 | 46.65±2.53 | 39.29±2.77 | | 45.54±1.64 | |
| BV/TV [%] | 2.94±1.98 | 6.25±1.62 | 0.53±0.26 | | 1.01±0.50 | |
| Tb.Sp [mm] | 0.42±0.10 | 0.54±0.13 | 0.93±0.10 | | 0.68±0.16 | |
| Tb.N [1/mm] | 1.91±0.37 | 2.29±0.54 | 0.99±0.11 | | 1.37±0.32 | |
| Tb.Th [mm] | 0.04±0.00 | 0.05±0.00 | 0.05±0.00 | | 0.05±0.00 | |
| Ct.Ar/Tt.Ar [%] | 36.46±2.33 | 40.29±2.24 | 40.95±4.02 | | 44.66±2.05 | |
| Tt. Ar [%] | 1.91±0.22 | 2.05±0.22 | 1.67±0.10 | | 1.69±0.09 | |
| Ct. Ar [mm²] | 0.68±0.08 | 0.78±0.04 | 0.69±0.07 | | 0.82±0.08 | |
| Ct. Th [mm] | 0.15±0.01 | 0.18±0.00 | 0.17±0.02 | | 0.19±0.01 | |
